# Supplementary material
Source: Springer Nature journal article supplement (https://www.springermedizin.de/resource/supplementary/13012_2008_109_MOESM6_ESM.pdf/9629264)

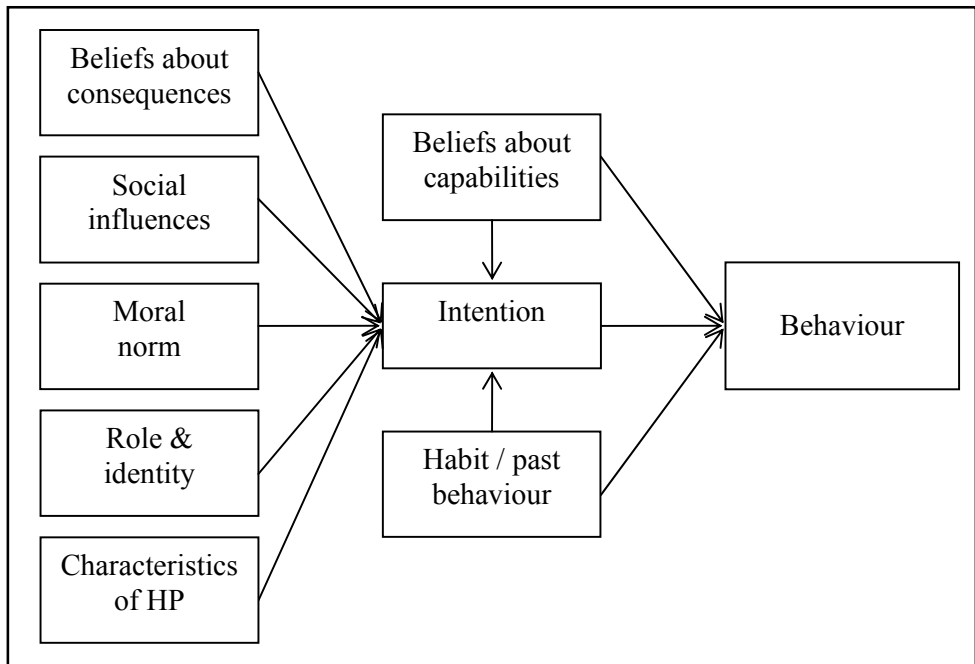

HP : Healthcare professional

Supplement: MOESM6 [file 9629264]
